# Supplementary material for: Health monitoring of finishing pigs by secondary data use – a longitudinal analysis
Source: PubMed Central journal article supplement (PMC7903635; doi:10.1186/s40813-021-00197-z), 2021-02-24
Supplement: 40813_2021_197_MOESM1_ESM.pdf [file 40813_2021_197_MOESM1_ESM.pdf]

## Descriptive statistics of indicators for IBW classes 1, 2 and 3

**Table A** Median (P50) and Interquartile range (IQR) of indicators in four half-years from July 1, 2017 to June 30, 2019 for Class 1 (n = 51)

| Indicator                      | 2017-2 |      | 2018-1 |      | 2018-2 |      | 2019-1 |       |
|--------------------------------|--------|------|--------|------|--------|------|--------|-------|
|                                | P50    | IQR  | P50    | IQR  | P50    | IQR  | P50    | IQR   |
| Mortality [%]                  | 3.08   | 1.36 | 3.65   | 3.09 | 3.26   | 2.01 | 4.51   | 2.28  |
| Average daily gain [g]         | 725    | 125  | 717    | 100  | 791    | 114  | 749    | 90    |
| Feed conversion ratio [kg/kg]  | 2.63   | 0.23 | 2.65   | 0.26 | 2.56   | 0.16 | 2.58   | 0.20  |
| Treatment frequency [UDD/FP]   | 0.35   | 2.88 | 0.08   | 1.89 | 0.18   | 1.27 | 0.24   | 0.85  |
| Pneumonia [%]                  | 10.33  | 6.86 | 10.46  | 5.38 | 7.46   | 5.77 | 7.17   | 11.74 |
| Pleurisy [%]                   | 3.39   | 6.10 | 2.43   | 9.54 | 1.70   | 5.39 | 2.64   | 10.98 |
| Pericarditis [%]               | 2.77   | 2.08 | 2.35   | 0.86 | 2.43   | 2.39 | 3.36   | 1.70  |
| Arthritis [%]                  | 0.26   | 1.13 | 0.35   | 0.76 | 0.62   | 1.06 | 0.23   | 0.48  |
| Abscess [%]                    | 0.78   | 1.30 | 0.80   | 0.64 | 0.75   | 0.94 | 0.93   | 0.95  |
| Ear lesions [%]                | 0.00   | 0.00 | 0.00   | 0.00 | 0.00   | 0.00 | 0.00   | 0.00  |
| Tail lesions [%]               | 0.16   | 0.79 | 0.58   | 1.19 | 1.02   | 1.20 | 1.13   | 1.41  |
| Dermal alterations [%]         | 0.05   | 0.20 | 0.00   | 0.10 | 0.11   | 0.39 | 0.05   | 0.34  |
| Bursitis [%]                   | 0.29   | 0.91 | 0.22   | 0.47 | 0.61   | 0.59 | 0.43   | 0.56  |
| Liver milk spots [%]           | 2.80   | 4.80 | 2.91   | 4.17 | 3.09   | 3.59 | 4.28   | 3.93  |
| Dermal damage [%]              | 0.00   | 0.02 | 0.00   | 0.02 | 0.00   | 0.00 | 0.00   | 0.00  |
| Intestinal alteration [%]      | 0.42   | 0.51 | 0.45   | 0.45 | 0.50   | 0.18 | 0.45   | 0.42  |
| Whole carcass condemnation [%] | 0.00   | 0.10 | 0.02   | 0.13 | 0.06   | 0.36 | 0.09   | 0.25  |

**Table B** Median (P50) and Interquartile range (IQR) of indicators in four half-years from July 1, 2017 to June 30, 2019 for Class 2 (n = 610)

| Indicator                      | 2017-2 |      | 2018-1 |      | 2018-2 |      | 2019-1 |       |
|--------------------------------|--------|------|--------|------|--------|------|--------|-------|
|                                | P50    | IQR  | P50    | IQR  | P50    | IQR  | P50    | IQR   |
| Mortality [%]                  | 2.38   | 1.60 | 2.26   | 1.45 | 2.37   | 1.59 | 2.40   | 1.75  |
| Average daily gain [g]         | 856    | 85   | 850    | 95   | 852    | 69   | 860    | 105   |
| Feed conversion ratio [kg/kg]  | 2.81   | 0.20 | 2.80   | 0.26 | 2.81   | 0.24 | 2.77   | 0.30  |
| Treatment frequency [UDD/FP]   | 0.72   | 2.90 | 0.49   | 2.92 | 0.55   | 3.12 | 0.46   | 2.61  |
| Pneumonia [%]                  | 10.74  | 8.91 | 10.34  | 9.26 | 8.52   | 8.90 | 9.64   | 11.33 |
| Pleurisy [%]                   | 4.54   | 7.44 | 4.15   | 8.58 | 3.74   | 5.52 | 4.50   | 8.99  |
| Pericarditis [%]               | 3.00   | 2.26 | 2.97   | 2.76 | 3.15   | 2.69 | 3.92   | 2.93  |
| Arthritis [%]                  | 0.55   | 0.65 | 0.50   | 0.60 | 0.66   | 0.86 | 0.40   | 0.61  |
| Abscess [%]                    | 0.87   | 0.67 | 0.79   | 0.62 | 0.92   | 0.82 | 0.90   | 0.82  |
| Ear lesions [%]                | 0.00   | 0.00 | 0.00   | 0.00 | 0.00   | 0.00 | 0.00   | 0.04  |
| Tail lesions [%]               | 0.42   | 0.79 | 0.37   | 0.73 | 0.54   | 1.03 | 0.57   | 1.03  |
| Dermal alterations [%]         | 0.07   | 0.20 | 0.12   | 0.28 | 0.15   | 0.22 | 0.08   | 0.20  |
| Bursitis [%]                   | 0.45   | 0.69 | 0.29   | 0.51 | 0.60   | 0.72 | 0.58   | 0.87  |
| Liver milk spots [%]           | 3.89   | 6.08 | 3.40   | 4.62 | 3.51   | 5.79 | 3.16   | 5.28  |
| Dermal damage [%]              | 0.00   | 0.00 | 0.00   | 0.00 | 0.00   | 0.00 | 0.00   | 0.00  |
| Intestinal alteration [%]      | 0.47   | 0.58 | 0.45   | 0.64 | 0.38   | 0.59 | 0.27   | 0.62  |
| Whole carcass condemnation [%] | 0.09   | 0.20 | 0.13   | 0.25 | 0.11   | 0.23 | 0.08   | 0.16  |

**Table C** Median (P50) and Interquartile range (IQR) of indicators in four half-years from July 1, 2017 to June 30, 2019 for Class 3 (n = 75)

| Indicator                      | 2017-2 |      | 2018-1 |       | 2018-2 |      | 2019-1 |       |
|--------------------------------|--------|------|--------|-------|--------|------|--------|-------|
|                                | P50    | IQR  | P50    | IQR   | P50    | IQR  | P50    | IQR   |
| Mortality [%]                  | 1.91   | 1.58 | 2.08   | 2.69  | 2.68   | 1.73 | 2.24   | 2.23  |
| Average daily gain [g]         | 847    | 100  | 838    | 124   | 846    | 76   | 841    | 127   |
| Feed conversion ratio [kg/kg]  | 2.89   | 0.22 | 2.86   | 0.27  | 2.82   | 0.11 | 2.72   | 0.26  |
| Treatment frequency [UDD/FP]   | 0.13   | 1.14 | 0.08   | 0.35  | 0.29   | 1.81 | 0.29   | 2.35  |
| Pneumonia [%]                  | 11.66  | 9.72 | 12.33  | 6.33  | 12.23  | 6.94 | 11.17  | 19.60 |
| Pleurisy [%]                   | 4.39   | 7.26 | 5.24   | 15.99 | 7.74   | 7.41 | 5.98   | 17.57 |
| Pericarditis [%]               | 4.64   | 4.37 | 3.84   | 3.02  | 4.59   | 3.38 | 5.24   | 5.75  |
| Arthritis [%]                  | 0.77   | 0.92 | 0.51   | 0.90  | 0.42   | 0.64 | 0.40   | 0.43  |
| Abscess [%]                    | 1.17   | 0.52 | 1.29   | 1.20  | 1.21   | 0.58 | 1.19   | 0.92  |
| Ear lesions [%]                | 0.00   | 0.00 | 0.00   | 0.00  | 0.00   | 0.00 | 0.00   | 0.00  |
| Tail lesions [%]               | 0.28   | 0.69 | 0.53   | 1.98  | 0.58   | 0.69 | 0.14   | 0.66  |
| Dermal alterations [%]         | 0.15   | 0.23 | 0.07   | 0.26  | 0.08   | 0.21 | 0.05   | 0.44  |
| Bursitis [%]                   | 0.23   | 0.43 | 0.31   | 0.83  | 0.65   | 0.82 | 0.59   | 0.66  |
| Liver milk spots [%]           | 6.55   | 8.52 | 4.63   | 4.09  | 6.33   | 5.90 | 4.26   | 2.87  |
| Dermal damage [%]              | 0.00   | 0.00 | 0.00   | 0.04  | 0.00   | 0.00 | 0.00   | 0.00  |
| Intestinal alteration [%]      | 0.61   | 1.21 | 0.44   | 0.56  | 0.69   | 0.59 | 0.89   | 0.68  |
| Whole carcass condemnation [%] | 0.05   | 0.18 | 0.18   | 0.36  | 0.16   | 0.22 | 0.16   | 0.24  |
